# Supplementary material for: RESISTANCE CONFERRING MUTATIONS IN SARS-CoV-2 DELTA FOLLOWING SOTROVIMAB INFUSION
Source: bioRxiv or medRxiv preprint supplement (doi:10.1101/2021.12.18.21267628), 2021-12-21

## Supplementary Material

### RESISTANCE CONFERRING MUTATIONS IN SARS-CoV-2 DELTA FOLLOWING SOTROVIMAB INFUSION

Rebecca J Rockett<sup>1,4</sup>, Kerri Basile<sup>2</sup>, Susan Maddocks<sup>2,3</sup>, Winkie Fong<sup>1</sup>, Jessica E Agius<sup>1</sup>, Jessica Johnson Mackinnon<sup>1</sup>, Alicia Arnott<sup>1,2</sup>, Shona Chandra<sup>1</sup>, Mailie Gall<sup>1</sup>, Jenny Draper<sup>1,2</sup>, Elena Martinez<sup>1</sup>, Eby Sim<sup>1,2</sup>, Clement Lee<sup>2</sup>, Christine Ngo<sup>2</sup>, Marc Ramsperger<sup>2</sup>, Andrew Ginn<sup>2</sup>, Qinning Wang<sup>2</sup>, Michael Fennell<sup>2</sup>, Danny Ko<sup>2</sup>, H Ling Lim<sup>2,5</sup>, Nicky Gilroy<sup>3</sup>, Matthew V N O'Sullivan<sup>1,2,3,4</sup>, Sharon C-A Chen<sup>1,2,4</sup>, Jen Kok<sup>1,2</sup>, Dominic E Dwyer<sup>1,2,4</sup>, Vitali Sintchenko<sup>1,2,4</sup>

**Figure S1. Outline of testing details for patients treated with sotrovimab**

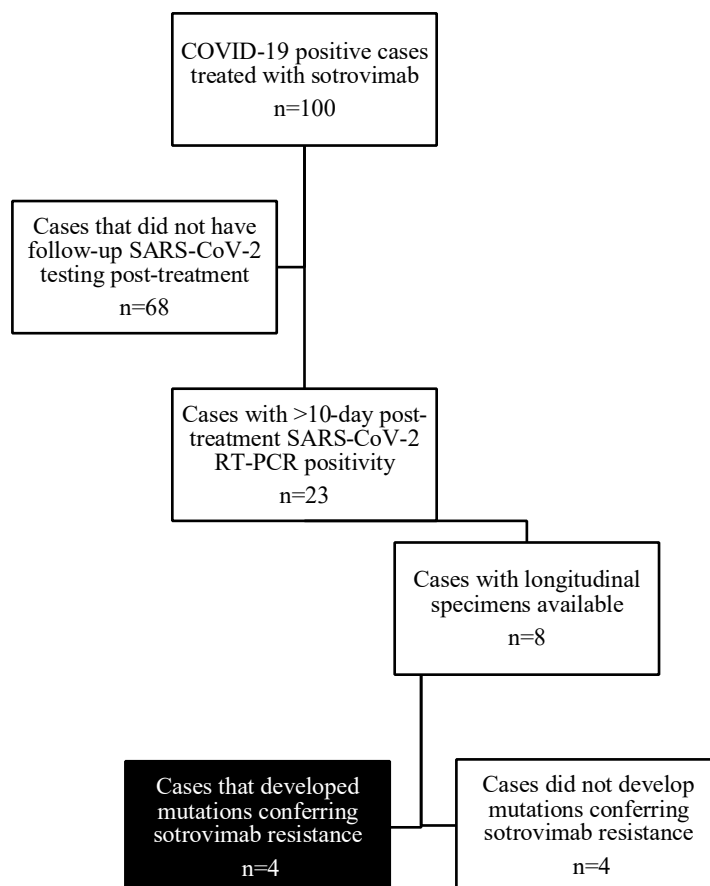

**Key:** COVID-19 – Coronavirus disease 2019 (COVID-19); RT-PCR – reverse transcriptase real time polymerase chain reaction; SARS-CoV-2 – Severe Acute Respiratory Syndrome Coronavirus 2

**Table S1. Extended demographic and clinical information**

| Case | Age (yrs) | Co-morbidities                 | Hospital Admission                   | Treatment                                                 | Vaccination Status          |
|------|-----------|--------------------------------|--------------------------------------|-----------------------------------------------------------|-----------------------------|
| R001 | 30-40     | Lung Tx                        | Y (ward based)                       | Dexamethasone<br>Remdesivir<br>Sotrovimab                 | 2 doses of Pfizer/BioNTech, |
| R002 | 30-40     | CVID                           | Y, ( ICU - ECMO, without intubation) | Dexamethasone,<br>Sarilumab,<br>Sotrovimab,<br>Remdesivir | 1 dose of Pfizer/BioNTech   |
| R003 | 20-30     | Renal Tx<br>CMV<br>BK viremia  | Y, (ward based)                      | Sotrovimab                                                | 1 dose of Pfizer/BioNTech   |
| R004 | 70-80     | Myeloproliferative disorder †  | Y (ward based)                       | Sotrovimab                                                | Unvaccinated                |
| R005 | 70-80     | Interstitial Lung disease†     | Y – (ward based)                     | Sotrovimab                                                | Unvaccinated                |
| R006 | 50-60     | Renal Tx, MM, T2 DM            | Y (ward based)                       | Baricitinib<br>Dexamethasone<br>Remdesivir<br>Sotrovimab  | Unvaccinated                |
| R007 | 60-70     | ESRF/T2DM                      | Y (ward based)                       | Dexamethasone<br>Sotrovimab                               | 1 dose of Pfizer/BioNTech,  |
| R008 | 70-80     | CLL (intragam),<br>ESRF,T2 DM, | Y (ward based)                       | Dexamethasone<br>Sotrovimab                               | 2 doses of Pfizer/BioNTech  |
| R009 | 30-40     | Nil known                      | N                                    | NIL                                                       | 2 doses of Pfizer/BioNTech  |
| R010 | 0-10      | Nil known                      | N                                    | NIL                                                       | Unvaccinated                |

**Key:** CLL – chronic lymphocytic leukaemia treated with intragam; Complete - two doses of BNT162b2 (Comirnaty, Pfizer/BioNTech) received 7 days before testing positive to SARSCoV-2 in accordance with COVID-19 local vaccination recommendations<sup>14</sup>; CMV – cytomegalovirus; CVID – Common variable Immunodeficiency, receives weekly IVIg; ECMO – extracorporeal membrane oxygenation, without intubation; ESRF- end stage renal failure; F – female; ICU – intensive care unit; IVIg- intravenous immunoglobulin; M – male; MM – multiple myeloma; N – No; Partial – either one dose of vaccine or receipt of the second dose <7 days from SARS-CoV-2 RNA detection by RT-PCR; T2 DM – Type 2 Diabetes Mellitus; Tx – transplant; Y – yes; † - passed away

**Figure S2. Outline of molecular, phenotypic and next generation sequencing methodology**

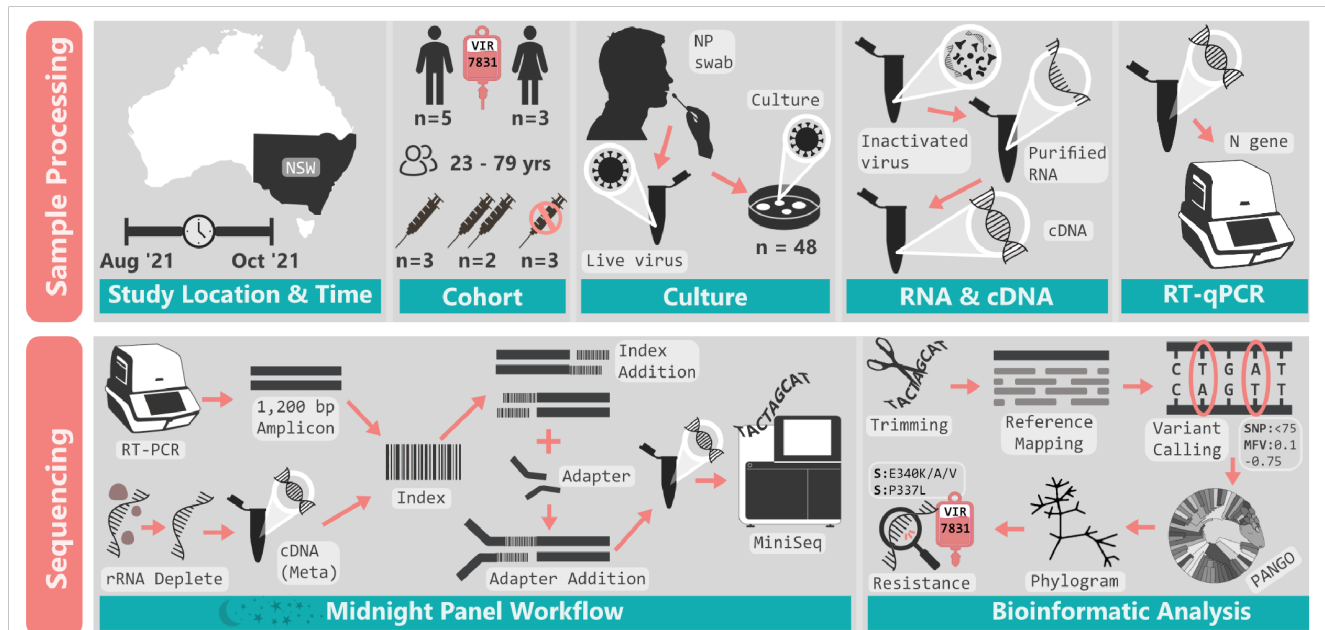

**Key:** NP swab – Nasopharyngeal swab; RT-PCR – reverse transcriptase real time polymerase chain reaction; N-gene – qRT-PCR amplifying the SARS-CoV-2 Nucleocapsid gene; rRNA deplete –rRNA Depletion (Human/Mouse/Rat), SNP – Single Nucleotide Polymorphism; MFV – Minority allele Frequency Variant; PANGO - Phylogenetic Assignment of Named Global Outbreak LINEages

**Figure S3.** Subsampled global phylogeny of SARS-CoV-2 highlighting Delta VOC genomes sequenced in this study

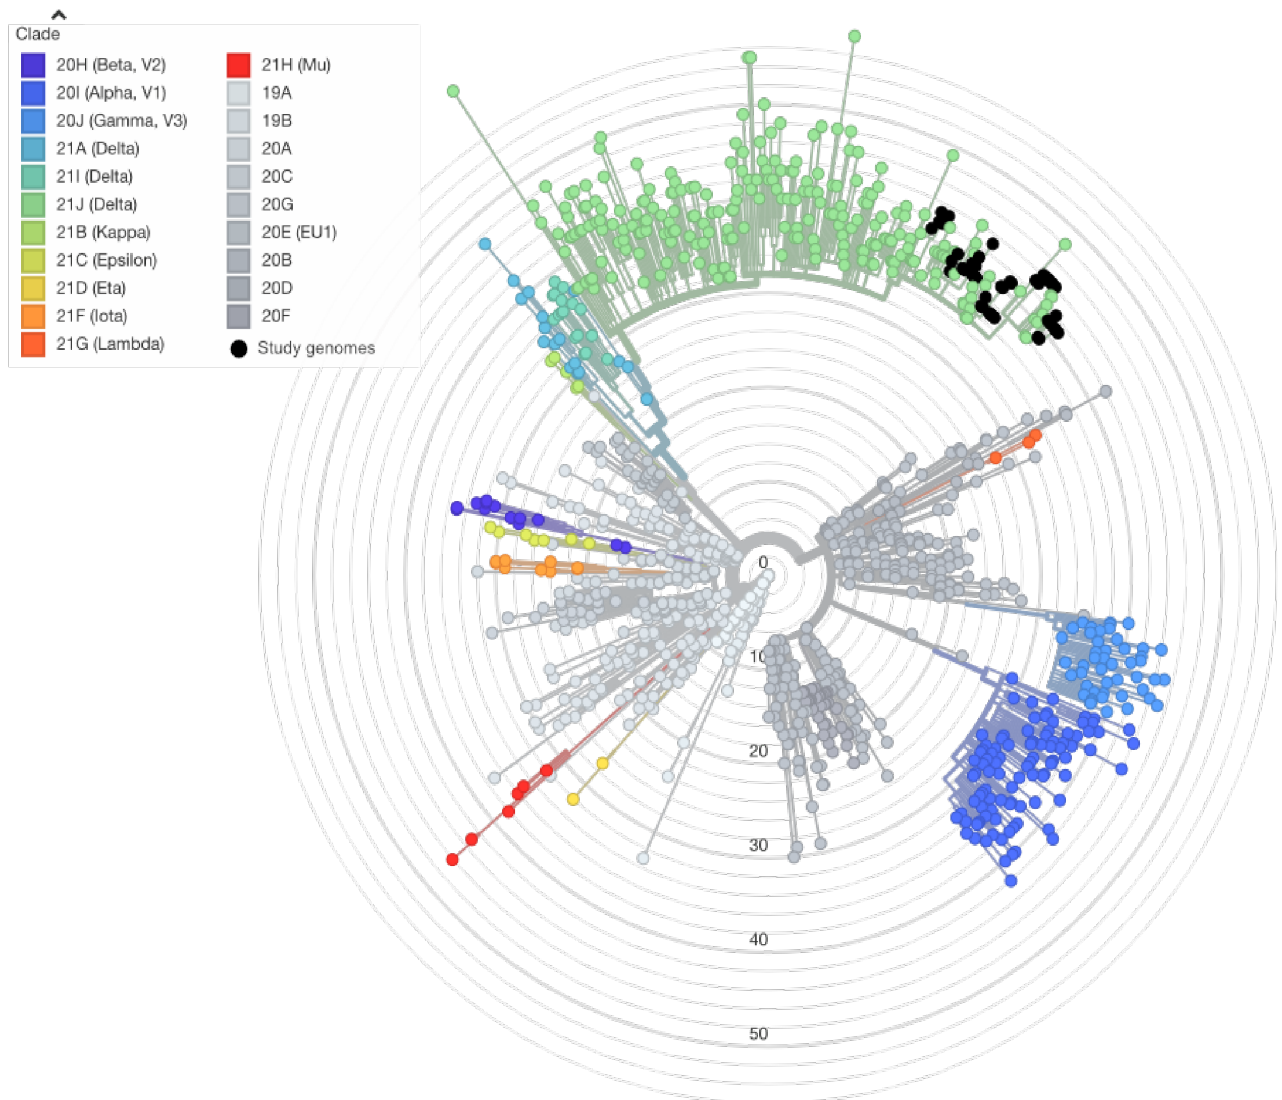

**Figure S3.** A maximum likelihood phylogeny representing the global diversity of SARSCoV-2 genomes during the study period (n= 1,084). Genomes generated as part of this study are highlighted with back nodes and are part of the Delta VOC (GISAD clade 21J) (n=50). Node colours depict SARS-CoV-2 lineages circulating globally

**Table S2.** SARS-CoV-2 genomes containing consensus mutations at E340K in NSW, Australia

| Virus name                           | Accession ID    | Lineage | COVID-19 treatments |
|--------------------------------------|-----------------|---------|---------------------|
| hCoV-19/Australia/NSWICPMR-7006/2021 | EPI_ISL_4205292 | AY.39.1 | Sotrovimab          |
| hCoV-19/Australia/NSWICPMR-9723/2021 | EPI_ISL_4968481 | AY.39.1 | Sotrovimab          |
| hCoV-19/Australia/NSWSAVID-6825/2021 | EPI_ISL_5321824 | AY.39.1 | Unknown             |
| hCoV-19/Australia/NSWSAVID-6814/2021 | EPI_ISL_5321822 | AY.39.1 | Unknown             |

**Table S3.** SARS-CoV-2 genomes containing sub-consensus mutations conferring sotrovimab resistance in NSW, Australia

| Genome ID | Treatment  | Conferring mutation (Read frequency) | GISAID Virus name                 |
|-----------|------------|--------------------------------------|-----------------------------------|
| R013      | Sotrovimab | S:E340K (0.99)                       | Not uploaded (incomplete)         |
| R017      | Unknown    | S:E340K (0.99)                       | Not uploaded (incomplete)         |
| R018      | Nil        | S:E340K (0.99)                       | Not uploaded                      |
| R019      | Nil        | S:P337T (0.99)                       | hCoV-19/Australia/NSW-ICPMR-11885 |
| R020      | Nil        | S:P337L (0.11)                       | hCoV-19/Australia/NSW-NSW1877     |
| R021      | Nil        | S:P337S (0.16)                       | hCoV-19/Australia/NSW-NSW4424     |

**Figure S4.** International incidence of S:E340K mutation: total 130 genomes

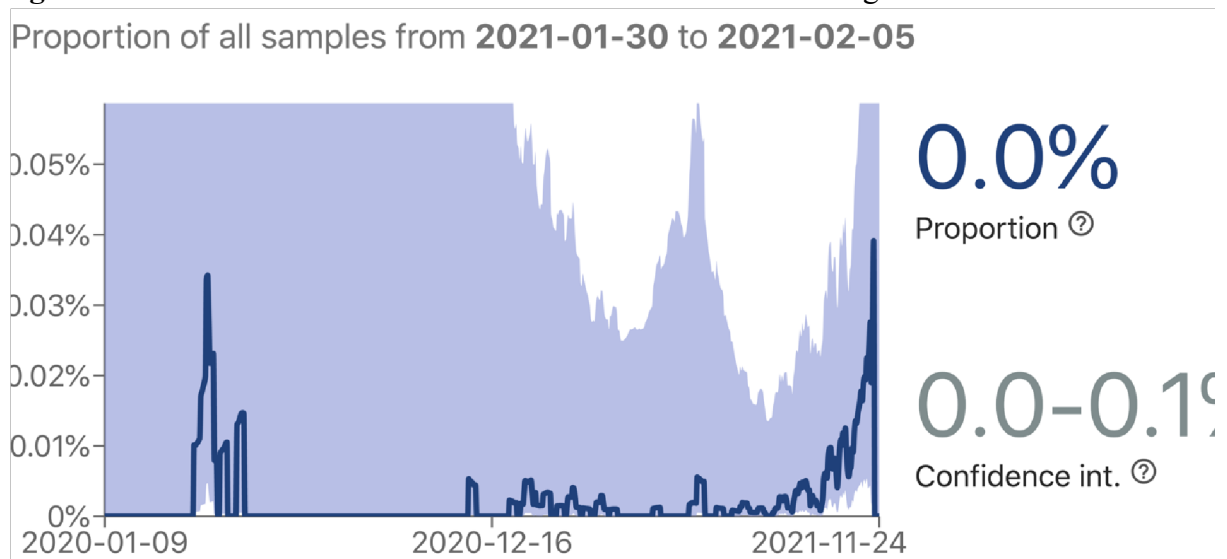

**Figure S5.** International incidence of S:E340A mutation: total 101 genomes

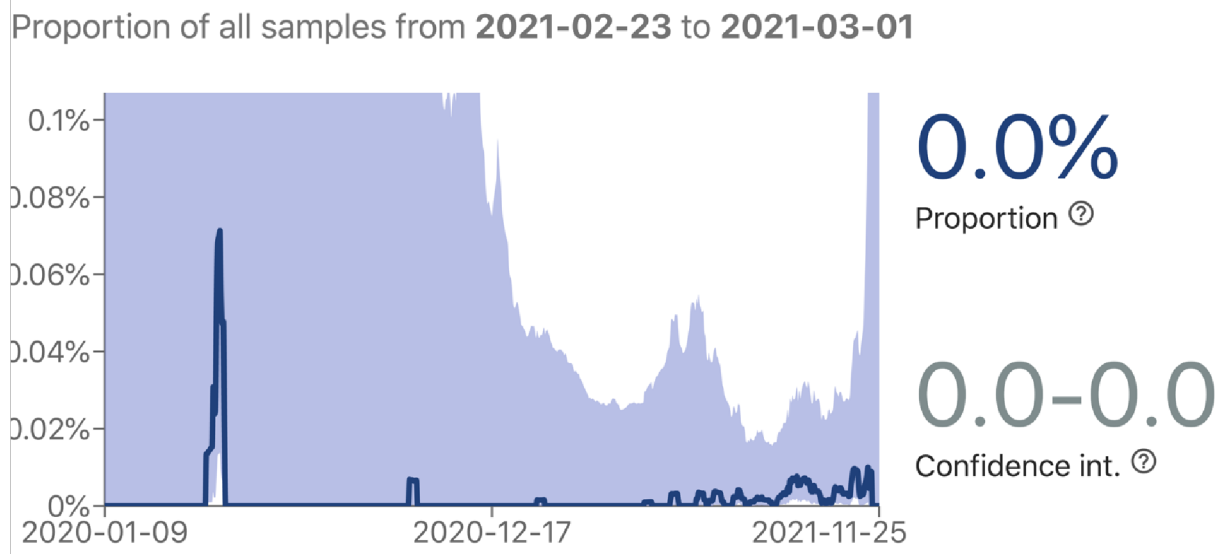

**Figure S6.** International incidence of S:E340V mutation: total 24 genomes

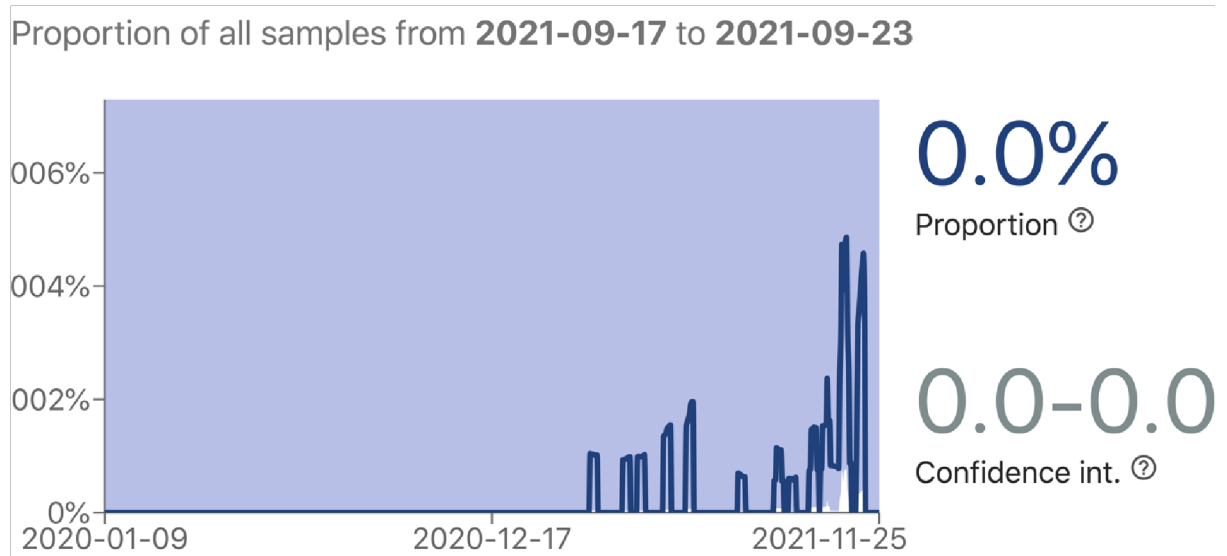

**Figure S7.** International incidence of P337L mutations: total 65 genomes

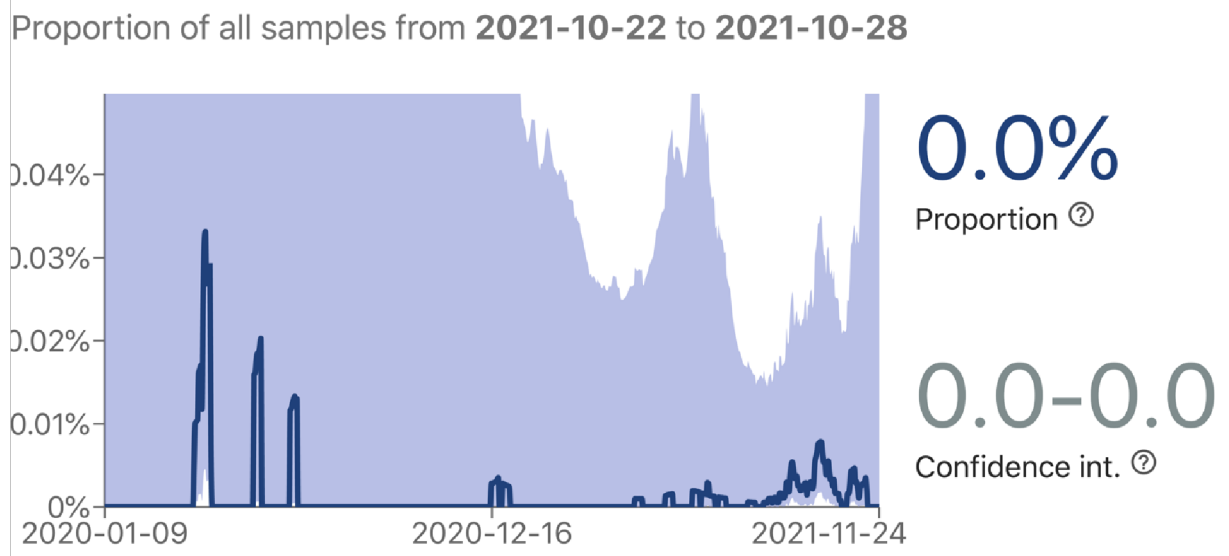

Supplement: Supplementary file [file media-2.pdf]
